# Supplementary material for: Larger hydrological simulation uncertainties where runoff generation capacity is high: insights from 63 catchments in southeastern China
Source: Copernicus journal article supplement (doi:10.5194/egusphere-2025-4445), 2025-10-28
Supplement: Supplementary file [file egusphere-2025-4445-AC2-supplement.pdf]

## **Summary**

The main goal of the paper is to analyze if predictors can be found that can indicate if calibrating a particular catchment only once will be sufficient to accurately estimate internal hydrological processes and variables (in this case the fraction subsurface flow), or that calculating an ensemble mean over multiple calibrations may be necessary for an accurate estimation because of parameter equifinality.

The authors calibrated the THREW model 50 times for each of the 63 catchments that were used in this study. The catchments were calibrated on streamflow using KGE as the objective function. A threshold value was applied to select only those parameter sets that performed reasonably well in terms of KGE. Four different measures were defined to describe the uncertainty in the estimated fraction subsurface flow resulting from simulations with the calibrated parameter sets. Linking the uncertainty measures to catchment characteristics, the authors found that for catchments with higher runoff ratios the estimation of the fraction subsurface flow was less certain.

The paper is well written and easy to follow, the language is clear, and the general topic of uncertainties in calibration strategies is relevant and interesting. However, I have a few concerns with regard to the methodology that is used within this study, which I will outline below, together with some other major and minor feedback.

## **Response:**

Thank you for your positive evaluation on our manuscript and your constructive suggestions. We will revise the paper according to your comments. Regarding the use of behavioral parameter sets for analysis, after careful discussion among the authors, we decided to retain this approach as it aligns well with the scope and aims of our study. Please see our detailed response to the relevant comment below.

## **Major comments:**

The authors compared two calibration strategies: calibrating the model only once and calibrating the model 50 times. They defined two measures (Bias and RBias) to analyze how representative the contribution of subsurface runoff ( $C_{sub}$ ) estimated by the parameter set with the highest KGE is. However, calibrating the model only once can results in any

of the 50 parameter sets with the same likelihood. There is no guarantee (and one cannot know) if the calibration resulted in the parameter set with the highest KGE value. Therefore, measures analyzing the representativeness of the best parameter set (in terms of KGE) seem to me to be not meaningful for the purpose of this study. The 'Bias' measure, for example, only shows to which extent  $C_{sub}$  modeled by the best parameter set corresponds to the mean  $C_{sub}$  of all calibrations, but it doesn't say anything at all about how wrong or inaccurate  $C_{sub}$  can possibly be for a single calibration.

The authors calibrated the model for each of the catchments 50 times. They then selected those parameter sets whose KGE exceeded a certain threshold, the so-called behavioral parameter sets, and used them for further analyses [Line 171-172]. I think this selection is problematic. Any of the removed parameter sets could be the result of a single calibration. Figure 5b clearly shows the possible consequences of excluding parameter sets from further analyses for the Shuikou catchment. For this catchment, all behavioral parameter sets have a  $C_{sub}$  value roughly between 25 and 32 (a rather small spread), but a single calibration could result in a  $C_{sub}$  value of at least up to 55. I understand that if a calibrated parameter set doesn't model the discharge very well, one may have less trust in the modeled  $C_{sub}$ . It's unfortunate that the optimization strategy was not very effective, given the often small number of behavioral parameter sets. But that doesn't mean that one can simply ignore the fact that a single calibration could result in any of the non-behavioral parameter sets.

I think it is important to zoom in a bit on the possible consequences of using a performance threshold for the results and/or conclusions of the paper. Even though the authors mention that it is difficult to define a QR threshold below which a single optimal parameter set can be judged sufficiently credible [Line 351-353], the paper implicitly concludes that the smaller the QR ratio, the smaller the uncertainty measures, and therefore the more likely that one calibration may be sufficient to accurately estimate  $C_{sub}$ . However, a strong, significant correlation was found between QR and the number of behavioral parameter sets [Line 305-307]. So, the lower the QR ratio, the more parameter sets were removed from the analysis due to the calibration algorithm struggling to find a good fit. In other words, for those catchments for which one calibration might potentially be sufficient according to

the analyses within this study, chances are rather high to end up with a parameter set that does not even calibrate the discharge well.

**Response:**

We thank the reviewer for this critical and interesting perspective. The reviewer raises a reasonable concern that a single random calibration does not guarantee finding behavioral parameter sets, and therefore, analysis based on behavioral parameter sets might seem not meaningful.

We have seriously considered the reviewer's suggestion to modify the analysis. However, after re-evaluating our research objectives, we believe that the current analytical framework remains reasonable for our specific study goals. Consequently, we do not intend to change the analysis strategy (i.e., still based on behavioral parameter sets), but we will improve the clarity of our methodology and objective, and add a discussion on limitations.

The reason for retaining the current analysis can be summarized as fourfold:

1. **The research objective is not to assess the performance of a single calibration runoff.** The primary goal of this study is not to assess whether a single calibration run is reliable, which is actually a question of algorithmic stability. Rather, we aim to answer: "Can the specific optimal parameter set (the one with the highest KGE) sufficiently represent the runoff component partitioning behavior derived from the ensemble of behavioral parameter sets?" In other words, we are comparing the representativeness of the "best model" strategy against the "ensemble" strategy, not the probability of a random calibration run's success.
2. **Behavioral model performance is the precondition of a reliable analysis on hydrological processes.** As the reviewer noted, non-behavioral parameter sets are inherently unreliable. In hydrological modeling, if a parameter set fails to reproduce discharge accurately, it is expected to be unable to simulate internal hydrological processes well, and is typically discarded. Our analysis focuses on the "behavioral" space because comparing the "best" set against "unreliable/poor" sets would not yield physically meaningful conclusions.

3. **Analysis based on a single optimal parameter set doesn't indicate to calibrate the model only once.** In our study, "using a single parameter set" refers to the practical workflow where a modeler selects the single best result for subsequent analysis (regardless of how many iterations it took to find it). In practice, even when analyzing based on the single optimal parameter set, it is generally obtained by a large number of calibration runs. We are assessing the uncertainty introduced by relying on this selected optimal set versus using the full behavioral ensemble.
4. **Analyzing the randomness of a single calibration runoff will introduce additional complexities related to the optimization algorithm used.** For instance, in our implementation of the NSGA-II algorithm, the optimal parameter set shows high stability and is highly reproducible when run multiple times under the same settings (e.g., calibrated parameter ranges, time of model runs). Focusing on the stochastic nature of the search process would shift the paper's focus toward algorithmic, which is beyond the scope of this hydrological study.

Although we will maintain the current data analysis, we acknowledge that our terminology led to this misunderstanding. Therefore, we plan to make the following revisions:

- We will explicitly state that our comparison is between the identified optimal parameter set and the behavioral ensemble, clarifying that we are not evaluating the "first random run" of an optimization algorithm.
- We will add a discussion in the Limitations section to address the reviewer's concern. We will acknowledge that in practice, if the number of calibration trials is insufficient, one might fail to identify a behavioral set (the "optimization failure" scenario). We will clarify that our study assumes a behavioral solution has been found, and that the uncertainty of "failing to calibrate" is a separate issue from the parameter equifinality discussed here.

**Specific questions / feedback:**

- Line 88-90: "(1) to quantify the uncertainty in the contribution of subsurface runoff (Csub) resulting from small changes in model performance metric (KGE)" -> As outlined earlier, for the purpose of this study, this should to my opinion have been e.g.: *'to quantify the uncertainty in the contribution of subsurface runoff (Csub) when calibrating a hydrological model multiple times'*.

**Response:**

We understand the reviewer's perspective. As explained in our response to the major comment, however, the focus of our study is not on the calibration process itself, but rather on the subsequent analysis using the calibrated parameters. Our goal is to assess how much uncertainty in Csub estimation arises when the analysis is based on a single optimal parameter set, using the ensemble of behavioral parameter sets as a benchmark. Since the estimation of runoff components is only meaningful when the model performs adequately well, we believe the original statement is appropriate in the context of our study.

- Line 159-160: "the optimization stopped when the objective converged or the number of model runs reached a threshold" -> Which of the 2 happened for the different calibrations within this study? Considering the often large number of non-behavioral parameter sets, it would be valuable to know if the calibration got stuck in a local optimum or reached the maximum number of model runs. In case of the latter, the number of model runs during each calibration might not have been set high enough.

**Response:**

In most cases, the calibration runs stopped due to convergence of the objective function rather than reaching the maximum number of model runs. In practice, we found that the limit of 3000 model runs per calibration was usually sufficient for the pySOT algorithm to reach a local optimum. Unfortunately, we did not retain detailed iteration records for each calibration and basin, so we cannot quantify exactly how often each of the two stopping criteria occurred. Nevertheless, we will clarify in the revised manuscript that, in most cases, the optimization terminated due to objective function convergence rather than the run limit.

- Line 204-205: KGE values for the best parameter sets are given, but how are the values for the other 49 parameter sets (range and/or distribution)?

**Response:**

We will provide the KGE range of 50 parameter sets in each basin in the Supplementary Information. However, since this section aims to summarize the model performance, only the best KGE values are reported in the main text.

- Line 219-221: "Considering the random generation of initial parameter sets within each pySOT running, the number of behavioral parameter sets serve as a partial indicator of model sensitivity." -> I don't agree with this statement. PySOT is an optimization algorithm, and the number of behavioral parameter sets tells more about how easy or difficult it is for the algorithm to find the optimum, i.e. about the 'smoothness' and the exact structure of the parameter space.

**Response:**

Thank you for pointing this out. We acknowledge that the phrase “model sensitivity” was not used accurately in this context. The number of behavioral parameter sets is indeed more indicative of the structure of the parameter space and the ease with which the optimization algorithm finds good solutions, rather than sensitivity in the strict sense. We will revise the term here.

Nonetheless, we would like to further discuss this point with the reviewer. As the reviewer noted, the number of behavioral parameter sets reflects the smoothness and structure of the parameter space. In other words, it reflects the relationship between model parameters and performance. Could this not also be interpreted as a reflection of the sensitivity of model performance to parameter changes?

- Line 271-273: "the 90th percentiles of Bias and Range were below 5% and 10%, respectively, when the KGE threshold was set 0.01 below KGE<sub>opt</sub>, indicating that C<sub>sub</sub> estimation is robust in most catchments if the threshold is set sufficiently high" -> I do not fully understand the reasoning here. Why exactly do the percentiles need to be low? If it is about robustness, one can set the threshold to KGE<sub>opt</sub>. Then there will be only one parameter set left, resulting in an 'excellent robustness' of C<sub>sub</sub>, with Bias, RBias, STD and Range all equal to 0...

**Response:**

We apologize for the confusion. In this context, the “90th percentile of Bias” refers to a statistic across the 50 catchments in our study: it means that 90% of the catchments have a Bias value below 5% when the KGE threshold is set to 0.01 below KGE<sub>opt</sub>. The metric that reflects the robustness of the C<sub>sub</sub> estimation is the Bias and Range themselves, rather than the “90th percentile” value.

However, as the reviewer noted, if the KGE threshold for defining behavioral sets is set sufficiently close to the optimum, the uncertainty in C<sub>sub</sub> estimation will always be low. What we aim to emphasize here is that even when the threshold is set just 0.01 below the optimum, the uncertainty can still be high in some catchments, as indicated by the spread in uncertainty metrics (the light color band in Figure 7). We will rephrase this explanation in the revision to avoid giving the impression that our intention was to emphasize the robustness.

- Figure 9: Is there a correlation between the number of behavioral parameter sets and the uncertainty measures (Bias and Range)? And could it be that the correlation between the uncertainty measures and QR is an artifact of the fact that not all parameter sets were used for the calculation of the uncertainty measures?

**Response:**

We have analyzed the relationship between the number of behavioral parameter sets and the uncertainty metrics. The number of behavioral sets does show a significant correlation with the uncertainty metrics, comparable to those between the runoff ratio (QR) and the corresponding metrics: specifically, the correlation between the number of behavioral sets and Bias is  $r = 0.44$  ( $p < 0.01$ ), and with Range is  $r = 0.31$  ( $p = 0.03$ ). We will add these results to the revised manuscript.

We acknowledge that restricting the analysis to only behavioral parameter sets may lead to these correlations. However, we do not consider this effect to be an “artifact”, because excluding non-behavioral parameter sets is a reasonable and commonly accepted practice. As the reviewer noted, good model performance is a prerequisite for reliable analysis of internal processes such as C<sub>sub</sub> estimation. Therefore, applying a KGE threshold to select behavioral sets for the uncertainty analysis is, in our view, appropriate. Otherwise,

including a large number of poorly performing parameter sets would likely result in extremely large biases and uncertainties, making the analysis less meaningful.

- Line 331-332: "the optimal parameter set can adequately represent the parameter sets that produced sufficiently high KGE" -> But how can one know what is 'sufficiently high'?

**Response:**

In this study, we implicitly assume that, after 50 calibration runs (exploring tens of thousands of model evaluations), the global optimal parameter set for each catchment has been found. Consequently, “sufficiently high” KGE refers to those parameter sets whose KGE values are very close to the optimal KGE of that catchment (i.e., the behavioral parameter sets). We will clarify this more explicitly in the revised manuscript.

- Line 350-353: "However, it is difficult to derive a reliable equation to predict potential modeling uncertainty from catchment attributes, or to define a MAR/QR threshold above or below which a single optimal parameter set can be judged sufficiently credible". Let's assume that such an equation and/or threshold could be defined. Since for studies involving multiple catchments it is common practice to treat all catchments in an identical way in order to be able to make comparisons and draw overall conclusions, calibrating some of the catchments only once, and others multiple times may complicate the analyses and conclusions. Can the authors elaborate a bit on which studies could benefit from an equation or threshold to decide if a single optimal parameter may be sufficient, and how they would apply it in practice?

**Response:**

Thank you for this interesting and important question. We believe our findings could benefit two types of studies in particular:

1. Catchment characteristics analysis based on hydrological model: For studies that use hydrological models to analyze catchment characteristics across many basins (e.g., the contribution of subsurface runoff,  $C_{sub}$ , as in our work), our conclusions could serve as a qualitative reference to flag catchments where larger uncertainty or bias is expected if only the optimal set is used for analysis. For instance, if a regional dataset of  $C_{sub}$  is



generated using hydrological modeling, our findings suggest extra caution is warranted for catchments with low runoff ratios and high variability.

2. General hydrological modeling studies: Our findings may also serve as a reference for determining whether parameter uncertainty needs to be a primary focus in a given modeling study. Hydrological models are used to explore a wide range of scientific questions, often involving complex processes and multiple sources of uncertainty. In many cases, it is difficult or impractical to address all uncertainties comprehensively within a single study. Our results suggest that, in catchments with relatively high precipitation and low runoff ratios, the uncertainty introduced by parameter equifinality may be relatively minor. Therefore, in such cases, researchers might reasonably shift their focus toward other sources of uncertainty or research priorities. We would like to emphasize again that this does not imply that only a single calibration run should be performed. Rather, it means that once a well-calibrated optimal parameter set has been obtained, analysis based on this set alone may be sufficiently reliable, and ensemble-based analysis may not be necessary.

- Line 363-365: "Because of deficiencies in observational data for multiple runoff components, it is difficult to directly validate the  $C_{sub}$  estimates in this study" -> Although validating the  $C_{sub}$  estimates is indeed difficult, I would suggest to include a map with the catchments color coded by  $C_{sub}$ . Spatial patterns of  $C_{sub}$  in combination with expert knowledge about the characteristics and behavior of the different catchments might be of help to assess the likelihood of correct  $C_{sub}$  values.

**Response:**

Thank you for your suggestion. We will add a map of  $C_{sub}$  in each catchment in the revised manuscript.

- Line 368-369: "such as an end-member mixing model and a groundwater model" -> Can you elaborate a bit more on these models, in particular to which extent modeling was based on field measurements/data.

**Response:**

We will add a description of these two types of models. Briefly, the end-member mixing model relies on extensive tracer (e.g., isotope) measurement data, and the contributions of

different water sources are determined based on mass balance. Groundwater models focus specifically on subsurface flow processes, with detailed representations that differ from those in typical rainfall-runoff models. These two types of models are fundamentally different from our hydrological model. In the revised manuscript, we will clarify that in two other catchments, the groundwater contributions to streamflow estimated by our hydrological model were found to be similar to the results obtained using these different modeling approaches. This consistency across independent methods provides validation for our  $C_{sub}$  estimates and increases our confidence in the reliability of our model results.

- Line 371-373: "the positive correlation between  $C_{sub}$  and topographic slope and the negative correlation between  $C_{sub}$  and mean annual rainfall are consistent with patterns reported in previous studies" -> Both correlations are not significant, and the correlation direction alone is not a very strong similarity.

**Response:**

Yes, this statement is indeed a little farfetched. We will delete this sentence in the revised manuscript.

**Minor comments:**

- Line 22-25: Are the KGE and  $C_{sub}$  statistics for 63 catchments (as mentioned here) or for the 50 catchments that have at least 10 behavioral parameter sets (as mentioned in the results section)?

**Response:**

We made a mistake here. The statistics refer to the 50 catchments that have at least 10 behavioral parameter sets. We will correct this in the revised manuscript.

- Line 47: "Parameter calibration is a necessary step in developing hydrological models" -> This depends on the type of model.

**Response:**

Yes, you are correct. The statement here is inaccurate. We will adjust it and mention the model type in the revised manuscript.

- Line 63-64: "single-optimal-parameter approaches remain the default in many applications" -> Refs are 12-15 years old. Please support the statement with some newer publications.

**Response:**

We will add some recent publications conducting analysis based on the single optimal parameter set.

- Line 110-111: "Considering the variable quality of the raw data (mainly completeness and temporal resolution)" -> What do you exactly mean by the temporal resolution being of 'variable quality' other than having missing data (which falls under 'completeness')?

**Response:**

We apologize for the unclear phrasing. Apart from the difference in temporal resolution caused by missing data, the temporal resolution of the raw data also differs among catchments (ranging from 5min to >1day). Meanwhile, the completeness also varied. Considering both aspects, we set the average temporal resolution of 3650s, to select the catchments whose raw resolution is not less than 1h and a good completeness. We will clarify this in the revised manuscript.

- Line 113: 'Exceeded' or 'was below 3650'?

**Response:**

We apologize for the unclear phrasing. The average time interval of the data is below 3,650 seconds, but since “higher resolution” typically refers to shorter time intervals, our original wording might cause confusion. We will rephrase this sentence to explicitly refer to the data's time interval to avoid confusion.

- Line 121-124: Were lapse rates used?

**Response:**

Lapse rates were not used.

- Line 128: "Soil parameters" -> which parameters are these?

**Response:**

The soil parameters include soil properties such as saturated hydraulic conductivity, porosity, field capacity, etc. We will list the specific soil parameters in the revised text for clarity.

- Figure 2 (and the corresponding model description in the text):
  - Use the same terminology consistently (e.g. u-zone, b-zone, n-zone etcetera).
  - Leave out the components that are not used in this study (snow, glacier)

**Response:**

We will revise Figure 2 accordingly.

- Line 149: "in our previous publications" -> Include refs.

**Response:**

We will add the related references.

- Table 2: Where are the parameters exactly used within the model and what is their exact function? If possible integrate the parameters into Figure 2.

**Response:**

We will add the parameters to Figure 2 to illustrate which process each parameter influences.

- Table 3: Include the meaning of the abbreviations in the caption.

**Response:**

We will add the meaning of abbreviations in the captions in the revised manuscript.

- Line 337-338: "Generalized Likelihood Unertainty Estimation (GLUE) framework" -> Add ref.

**Response:**

We will add related references in the revised manuscript.
